# Supplementary material for: Solid state 1H, 7Li, and 13C NMR studies on new ionic plastic crystals of crown ether–Li-TFSA complexes
Source: Royal Society of Chemistry journal article supplement (doi:10.1039/d3cp02614k), 2023-01-01
Supplement: d3cp02614k1.pdf [file d3cp02614k1.pdf]

Supporting Information

## Solid-State $^1\text{H}$ , $^7\text{Li}$ , and $^{13}\text{C}$ NMR Studied on A New Ionic Plastic Crystal of Crown Ether - LiTfSA Complex

Akira Kobayashi,<sup>a</sup> Jun Yamagami,<sup>b</sup> Subham Ranjan,<sup>a</sup> Satoshi Takamizawa<sup>ab</sup> and Hisashi Honda<sup>ab\*</sup>

<sup>a</sup> Graduate School of Nanobioscience, Yokohama City University, Kanazawa-ku, Yokohama, 236-0027

<sup>b</sup> International College of Arts and Sciences, Yokohama City University, Kanazawa-ku, Yokohama, 236-0027

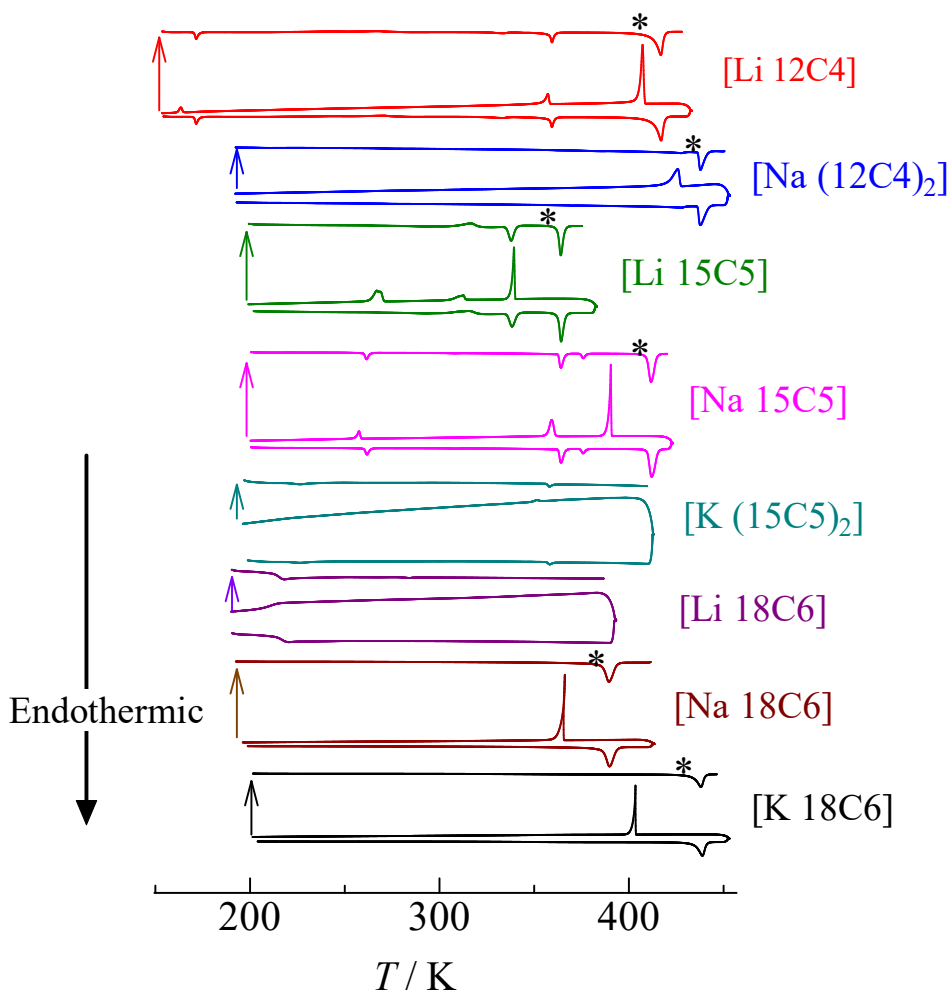

Fig. S1 DSC thermograms of  $[\text{M} (3n)\text{C}_n]$  ( $\text{M} = \text{Li}, \text{Na}, \text{K}; n = 4-6$ ) in the 1st and 2nd heating and the 2nd cooling processes.

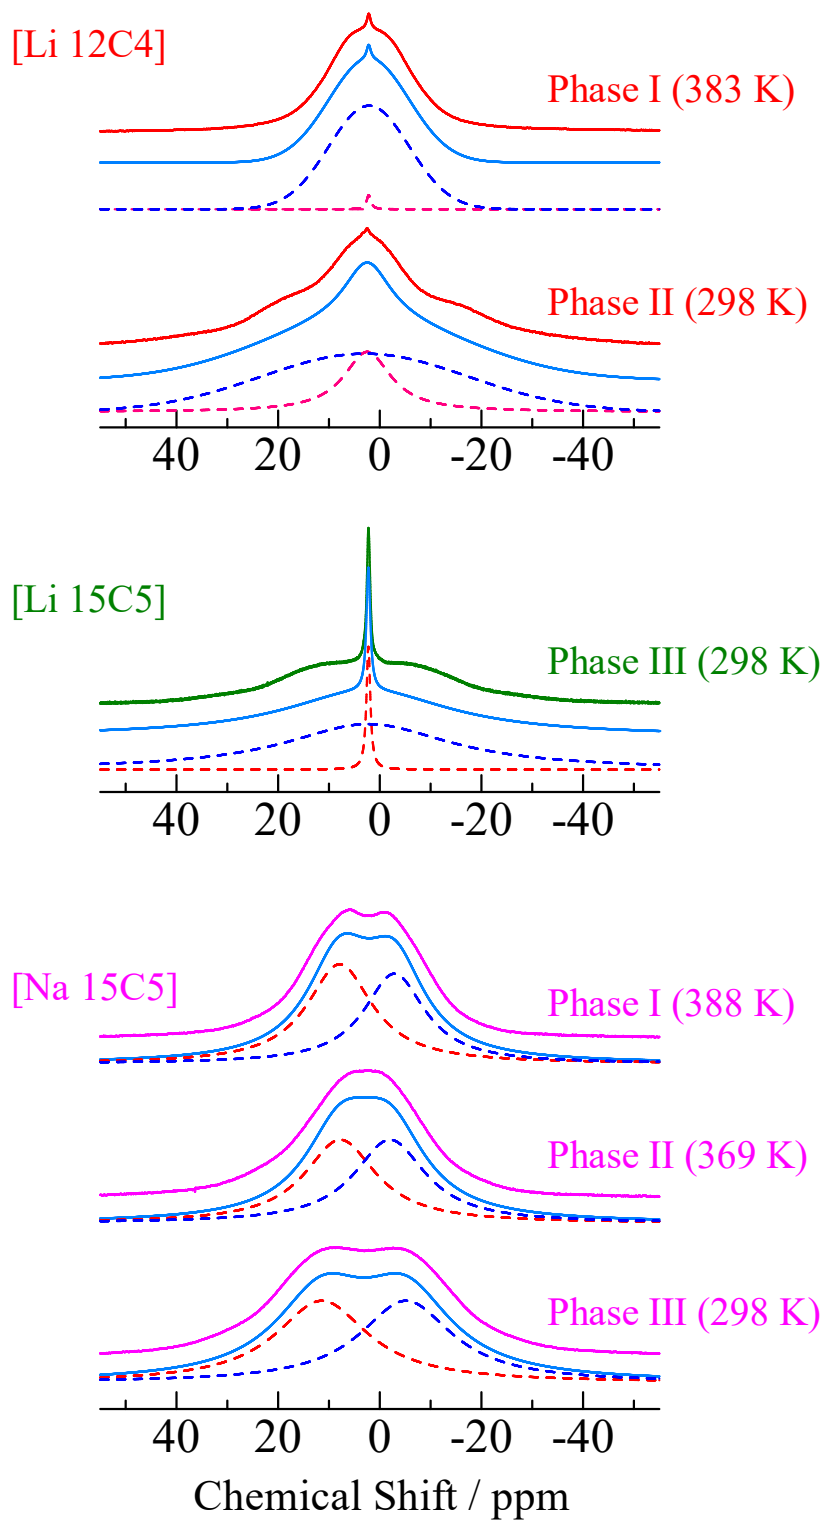

Fig. S2. Spectral analysis of  $^1\text{H}$  NMR spectra for [Li 12C4], [Li 15C5], and [Na 15C5]. Here, blue solid lines are line envelope obtained by summing, and broken ones are analyzing lines.

Table S1 Values of the peak shift  $\nu$  (ppm), the full width at half-maximum  $\Delta\nu$  (kHz) and area ratio of the analyzed lines shown in Fig. S2.

|                 | $\nu$ / ppm | $\Delta\nu$ / kHz | Area Ratio |
|-----------------|-------------|-------------------|------------|
| [Li 12C4] 383 K | 2.1         | 0.6               | 0.01       |
|                 | 2.1         | 18.6              | 0.99       |
| [Li 12C4] 298 K | 2.5         | 6.8               | 0.25       |
|                 | 2.5         | 28.8              | 0.75       |
| [Li 15C5] 298 K | 2.2         | 0.9               | 0.07       |
|                 | 2.2         | 40.0              | 0.93       |
| [Na 15C5] 388 K | 7.9         | 15.6              | 0.54       |
|                 | -2.9        | 14.6              | 0.46       |
| [Na 15C5] 369 K | 7.8         | 17.1              | 0.50       |
|                 | -2.0        | 17.1              | 0.50       |
| [Na 15C5] 369 K | 11.4        | 22.1              | 0.50       |
|                 | -5.2        | 24.1              | 0.50       |

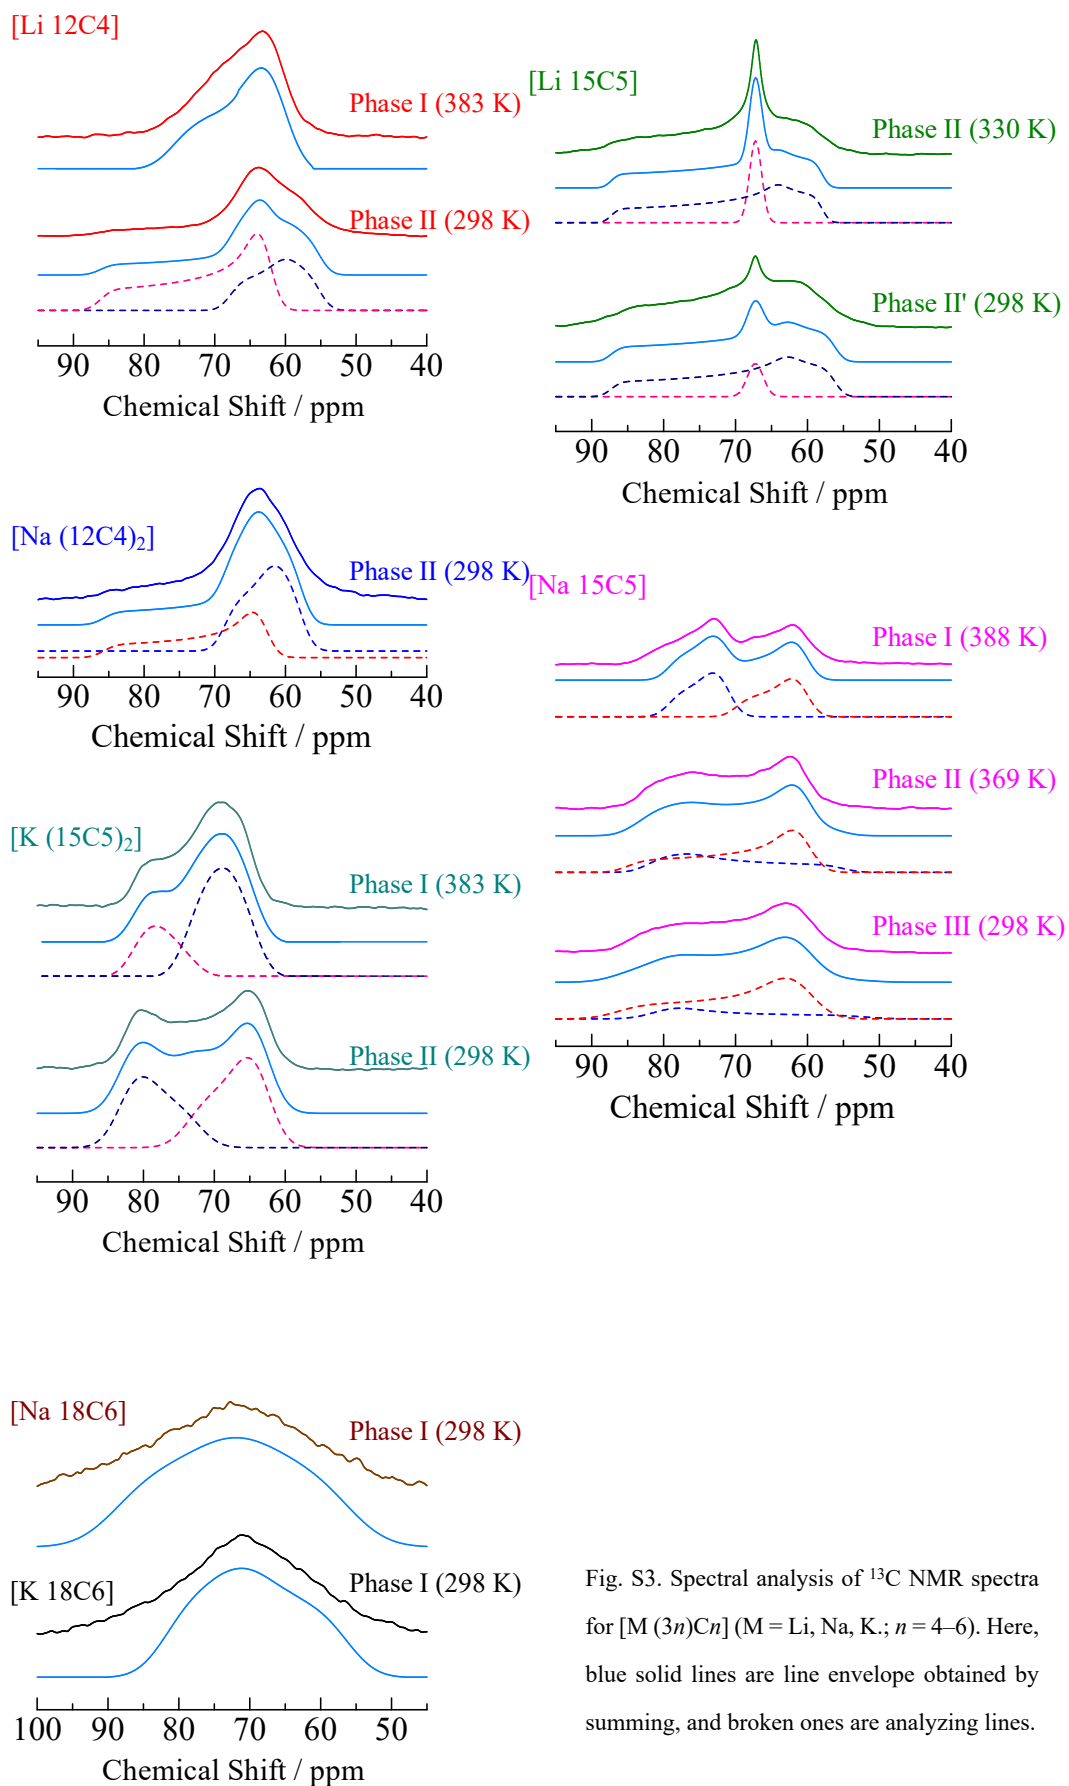

Fig. S3. Spectral analysis of  $^{13}\text{C}$  NMR spectra for  $[\text{M}(3n)\text{C}_n]$  ( $\text{M} = \text{Li}, \text{Na}, \text{K}; n = 4-6$ ). Here, blue solid lines are line envelope obtained by summing, and broken ones are analyzing lines.

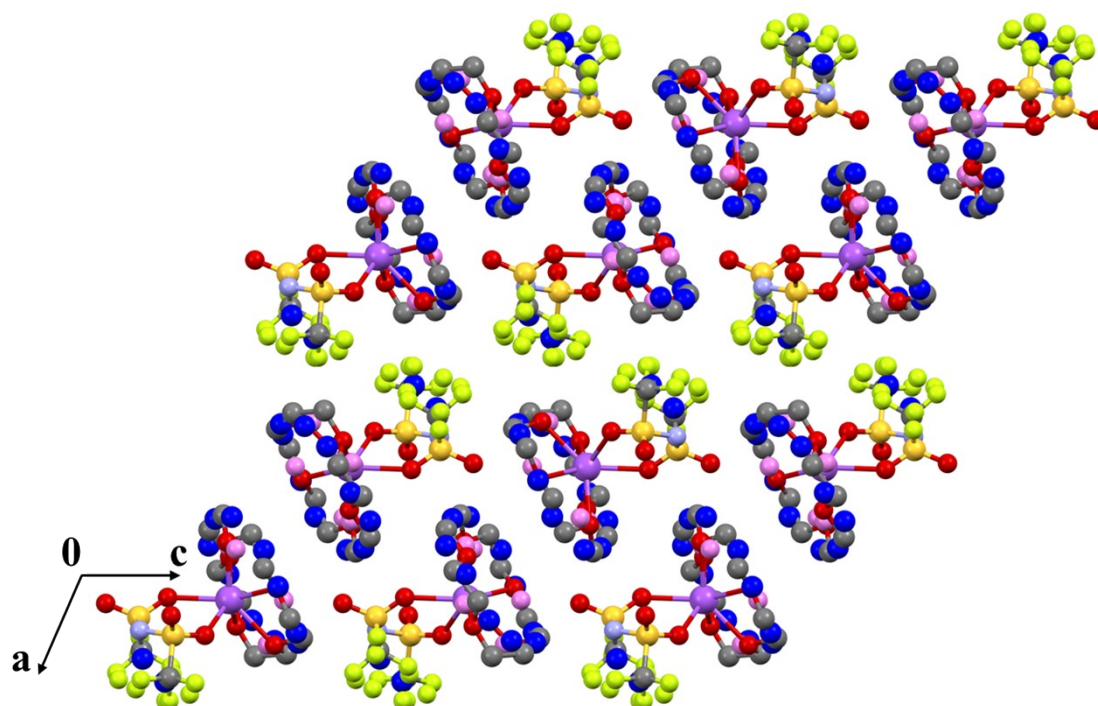

Fig. S4. A crystal packing diagrams of [Na 15C5] at 253K. The low occupancy part of the disordered molecules carbon, oxygen and fluorine are coloured as blue, violet and green, respectively. Hydrogens are omitted for clarity.

Table S1 Na-O distances and O-C-C angles determined by the SCXRD measurement at 253K.

|                       | Structure A (High Occupancy) | Structure B (low Occupancy) |
|-----------------------|------------------------------|-----------------------------|
| Na-O(1A) Distance     | 2.427 Å                      | 2.465 Å                     |
| Na-O(2) Distance      | 2.409 Å                      | 2.365 Å                     |
| Na-O(3) Distance      | 2.478 Å                      | 2.430 Å                     |
| Na-O(4) Distance      | 2.417 Å                      | 2.386 Å                     |
| Na-O(5) Distance      | 2.409 Å                      | 2.436 Å                     |
| O(1)-C(1)-C(2) Angle  | 108.81°                      | 109.11°                     |
| O(2)-C(3)-C(4) Angle  | 104.23°                      | 92.94°                      |
| O(3)-C(5)-C(6) Angle  | 106.57°                      | 123.68°                     |
| O(4)-C(7)-C(8) Angle  | 110.15°                      | 110.73°                     |
| O(5)-C(9)-C(10) Angle | 110.58°                      | 111.17°                     |

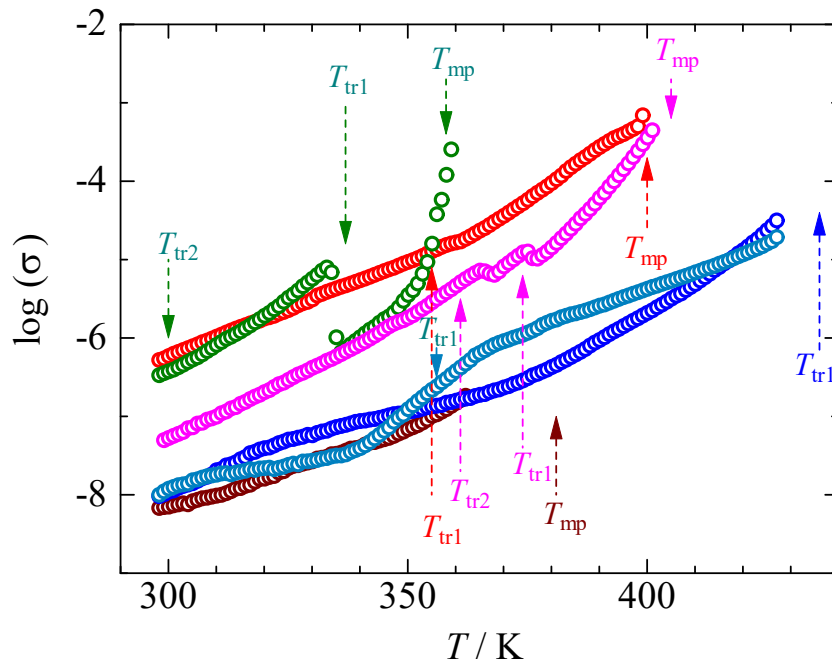

Fig. S5. Electrical conductivity  $\sigma$  of [Li 12C4] (○), [Na (12C4)<sub>2</sub>] (○), [Li 15C5] (○), [Na 15C5] (○), [K (15C5)<sub>2</sub>] (○), and [Na 18C6] (○) as a function of temperature.
